# Supplementary material
Source: publisher site journal article supplement (https://www.dovepress.com/article/271842)
Supplement: Supplementary file 1 [file get_supplementary_file.php]

**Supplement: Summary of proposed clinical sites for the study**

1. Shanghai Mental Health Center, Shanghai Jiao Tong University School of Medicine
2. Peking University Sixth Hospital
3. Harbin First Specific Hospital
4. The First Affiliated Hospital of Xi'an Jiao Tong University
5. Wuhan Mental Health Center
6. Hangzhou Seventh People's Hospital
7. Shandong Mental Health Center
8. Shenzhen Kangning Hospital
